# Supplementary material for: Galvanic Replacement of Electrochemically Restructured Copper Electrodes with Gold and Its Electrocatalytic Activity for Nitrate Ion Reduction
Source: MDPI journal article supplement (doi:10.3390/nano8100756), 2018-09-25
Supplement: s1 [file s1]

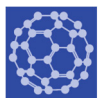

# Galvanic Replacement of Electrochemically Restructured Copper Electrodes with Gold and its Electrocatalytic Activity for Nitrate Ion Reduction

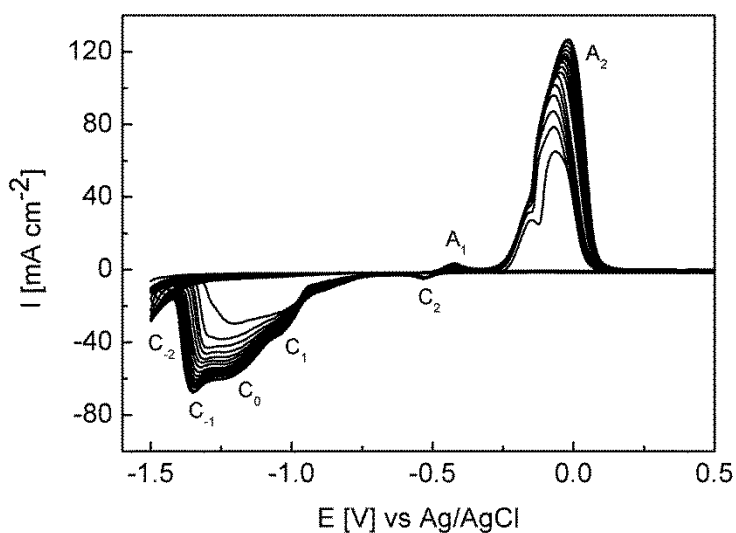

**Figure S1.** Repetitive cyclic voltammograms (20 cycles), recorded at a Cu foil electrode in 1 M NaOH at  $10 \text{ mV s}^{-1}$ .

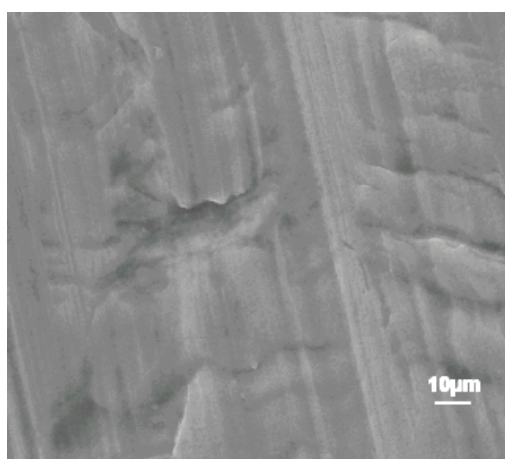

**Figure S2.** Scanning electron microscopy (SEM) image of an unmodified Cu electrode.

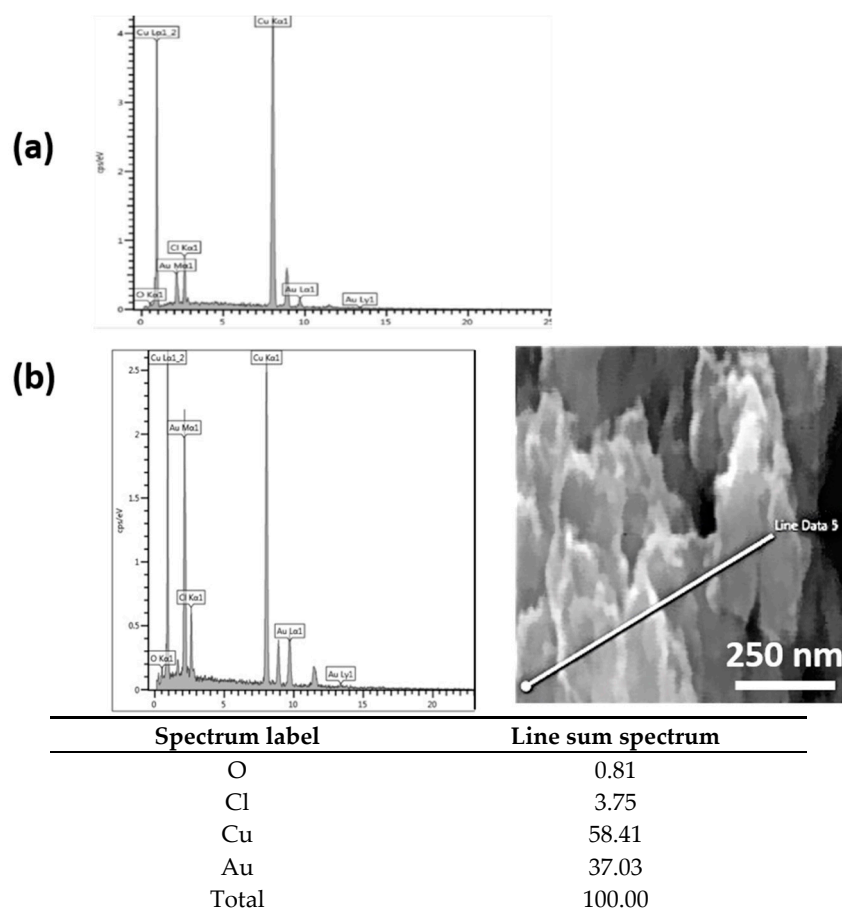

**Figure S3.** (a) EDX spectrum for a restructured Cu foil galvanically replaced with gold via immersion in an aqueous solution of HAuCl<sub>4</sub> for 3 min, and (b) a line spectrum taken through a deposit on the surface which indicates a high concentration of gold.

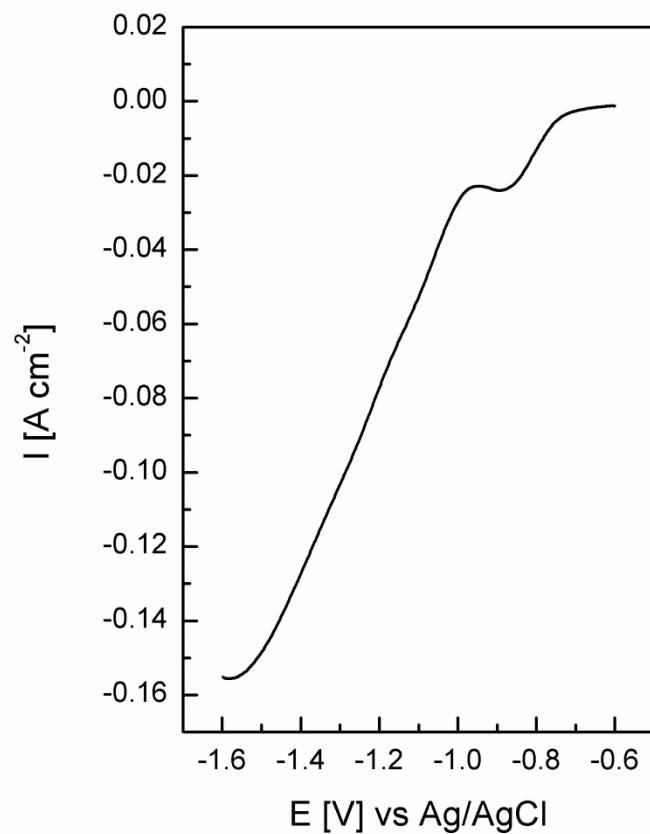

**Figure S4.** Linear sweep voltammogram recorded at  $100 \text{ mV s}^{-1}$  in 1 M NaOH in the presence of 0.1 M  $\text{KNO}_3$  at a Cu foil electrode galvanically replaced with gold via immersion in an aqueous solution of  $\text{HAuCl}_4$  for 3 min.

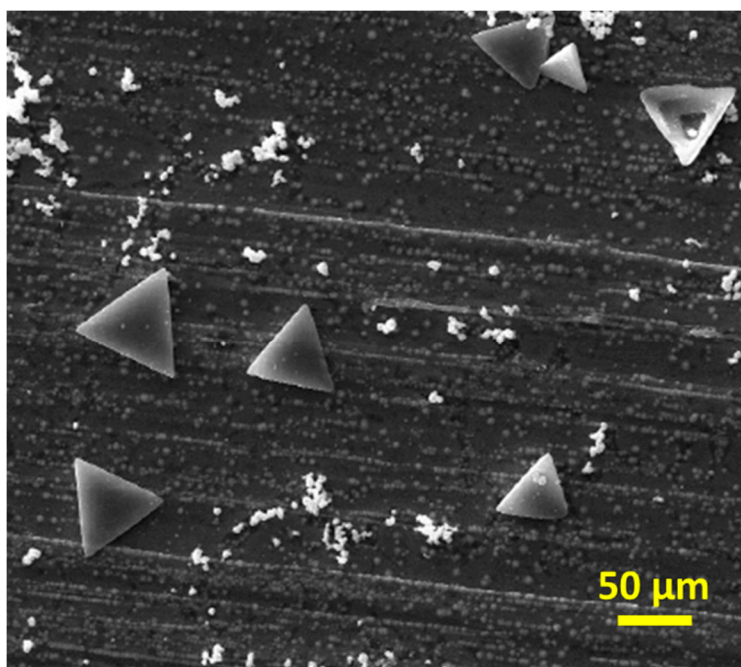

**Figure S5.** SEM image of a Cu foil electrode galvanically replaced with gold via immersion in an aqueous solution of  $\text{HAuCl}_4$  for 3 min.
